# Supplementary material for: Aggregation and thermal gelation of N-isopropylacrylamide based cucurbit[7]uril side-chain polypseudorotaxanes with low pseudorotaxane content
Source: Royal Society of Chemistry journal article supplement (doi:10.1039/c4ra17140c), 2015-01-01
Supplement: c4ra17140c1.pdf [file c4ra17140c1.pdf]

## Supplementary Information

### Aggregation and thermal gelation of N-isopropylacrylamide based cucurbit[7]uril side-chain polypseudorotaxanes with low pseudorotaxane content

Hao Chen,<sup>ab</sup> Haili Ma,<sup>ab</sup> Yu Yuan Chieng,<sup>c</sup> Shengzhen Hou,<sup>ab</sup> Xu Li<sup>\*c</sup> and Yebang

Tan<sup>\*ab</sup>

<sup>a</sup>School of Chemistry and Chemical Engineering, Shandong University, Jinan 250100,

People's Republic of China

<sup>b</sup>The Key Laboratory of Special Functional Aggregated Materials, Ministry of

Education, Shandong University, Jinan 250100, People's Republic of China

<sup>c</sup>Institute of Materials Research and Engineering, Agency for Science, Technology and Research (A\*STAR), 3 Research Link, Singapore 117602

#### Synthesis Procedures

**Synthesis of N,N-dimethyl amantadine.** A mixture of 18.7 g (0.1 mol) Amantadine hydrochloride, 20 mL H<sub>2</sub>O, 21 mL 88 % formic acid and 34 mL 40 % formaldehyde was heated to reflux for 15 hours. The yielding solution was neutralized with NaOH and adjusted pH to 11 – 12. The oily layer formed on the solution surface was extracted with dichloromethane. The extract was then dried over potassium carbonate and dichloromethane was rotate evaporated to obtain the product as a colorless oil (16.1 g, 92 %). <sup>1</sup>H NMR (CDCl<sub>3</sub>, 400 MHz), δ (ppm): 2.27 (s, 6H), 2.09 (s, 3H), 1.69 (d, J = 2.6 Hz, 6H), 1.60 (q, J = 12.2 Hz, 6H). <sup>13</sup>C NMR (CDCl<sub>3</sub>, 400 MHz), δ (ppm): 42.03, 37.78, 36.78, 36.66, 29.36. HRMS:[M+H]<sup>+</sup> calcd for C<sub>12</sub>H<sub>22</sub>N<sup>+</sup>: 180.1752, found:180.1764.

**Synthesis of N-adamantyl-N-(4-vinyl benzyl)-N,N-dimethyl ammonium chloride (AD4VBDMA).** N,N-dimethyl amantadine (8.7 g, 0.05 mol) and 4-vinylbenzyl

chloride (9.2 g, 0.06 mol) were dissolved in 50 mL methanol and heated to reflux for 12 hours. Finally, the solution was poured into dimethyl ether to yield a white precipitate. The precipitate was washed with dimethyl ether and dried under vacuum (15.3 g, 94 %).  $^1\text{H}$  NMR (400 MHz,  $\text{D}_2\text{O}$ )  $\delta$  (ppm): 7.54 (d,  $J = 8.2$  Hz, 2H), 7.40 (d,  $J = 8.2$  Hz, 2H), 6.77 (dd,  $J = 17.7, 11.0$  Hz, 1H), 5.88 (d,  $J = 17.7$  Hz, 1H), 5.35 (d,  $J = 11.0$  Hz, 1H), 4.19 (s, 2H), 2.65 (s, 6H), 2.28 (s, 3H), 2.10 (d,  $J = 2.1$  Hz, 6H), 1.65 (q,  $J = 12.6$  Hz, 6H).  $^{13}\text{C}$  NMR ( $\text{D}_2\text{O}$ , 400 MHz),  $\delta$  (ppm): 139.37, 135.74, 133.93, 127.32, 126.55, 116.22, 75.53, 60.09, 42.77, 34.65, 30.41. HRMS: $[\text{M}-\text{Cl}]^+$  calcd for  $\text{C}_{21}\text{H}_{30}\text{N}^+$ : 296.2378, found: 296.2396.

## Characterizations

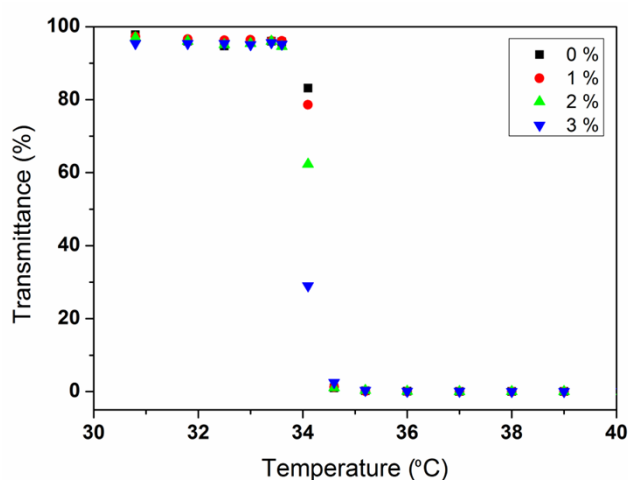

**Figure S1** Transmittance-temperature plots of polypseudorotaxanes with different pseudorotaxane content.

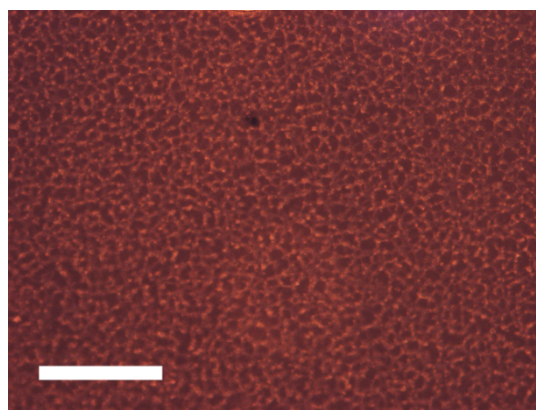

**Figure S2** Polarizing microscopic image of polypseudorotaxanes with 2 mol% pseudorotaxane unit (The scale bar is 25  $\mu\text{m}$ ; The contrast of polarizing microscopic image was improved for clearance).

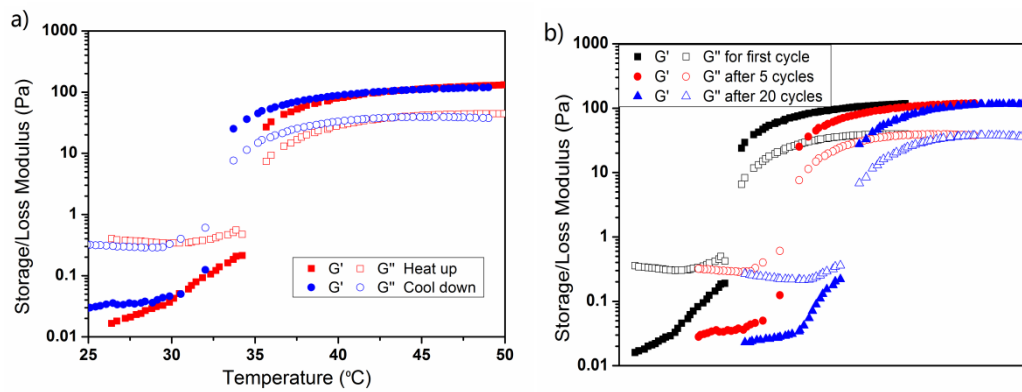

**Figure S3** Reversibility of 5 wt% polypseudorotaxanes with 1.75 mol% pseudorotaxane units: a) heating and cooling cycle and b) heating curves after several heat-cool cycles (Plots were parallel shifted for clear illustration).
